# Supplementary material
Source: publisher figshare collection journal article supplement (https://springernature.figshare.com/ndownloader/files/22849784)
Supplement: Supplementary file 1 [file 22849784]

**Additional file 2:** Pattern and distribution of the *TP53* mutations in the cohort according to (A) Mutation type (B) Mutation effect on TP53 protein sequence (C) Exon/ Intron distribution (D) Fun­ctional effect (E) SIFT prediction (IARC TP53 Database)

(N =100, lung cancer subjects).

**
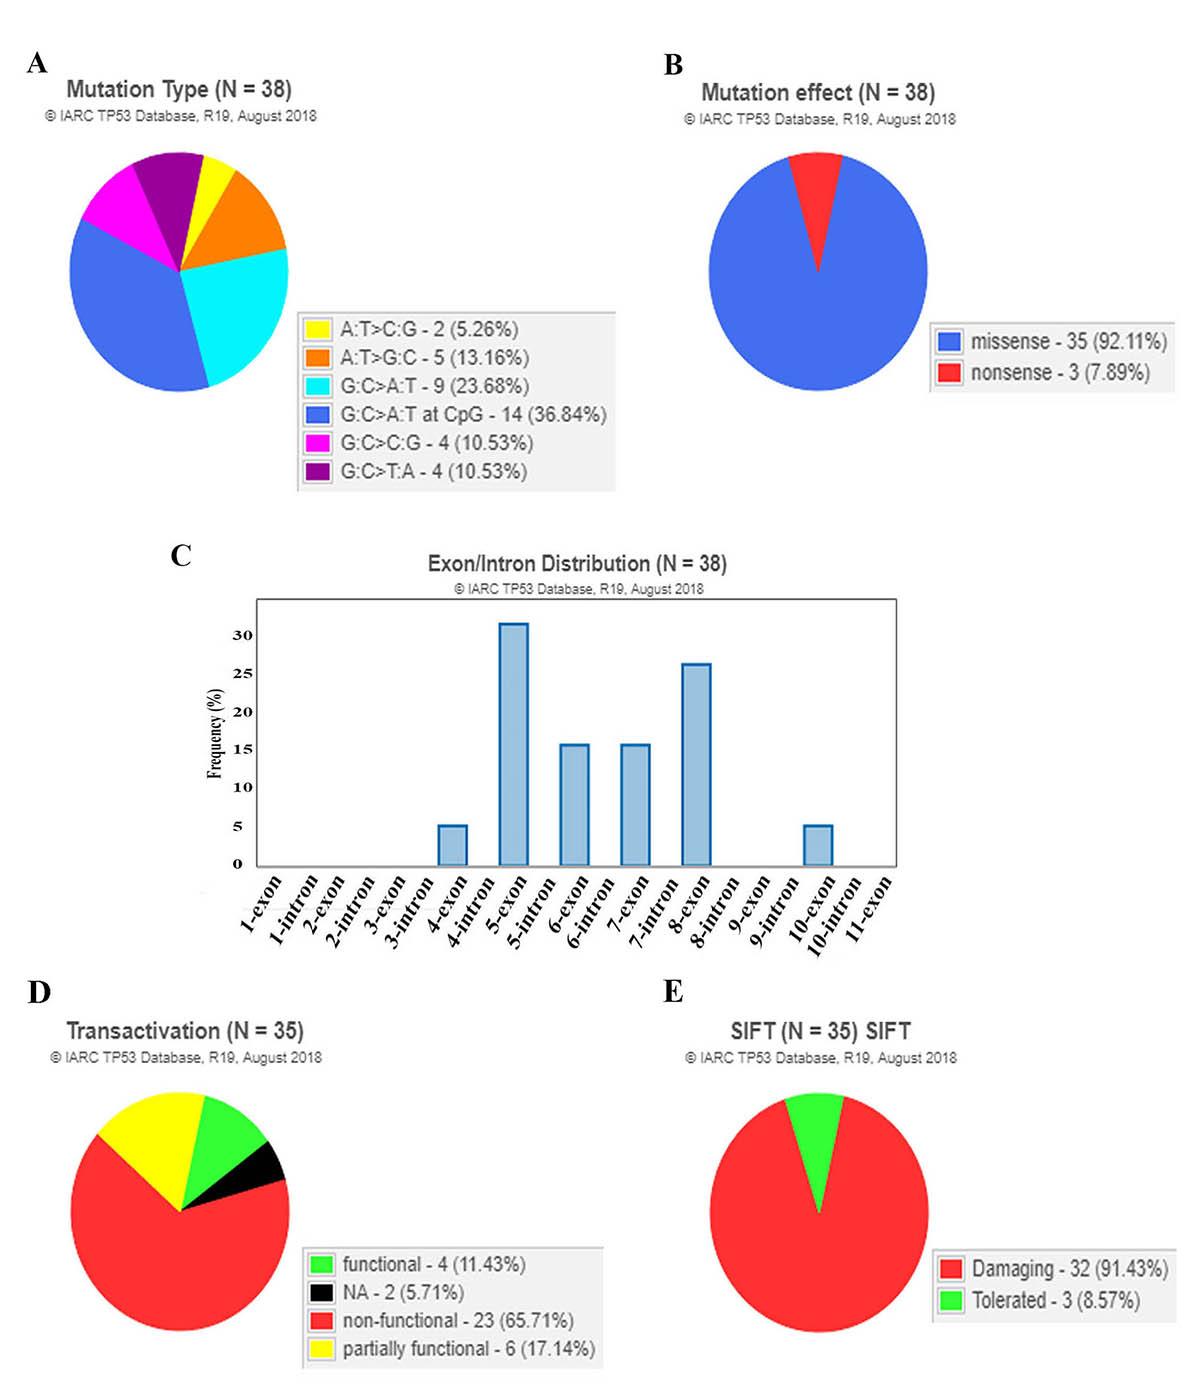
**
